# Supplementary material
Source: Springer Nature journal article supplement (https://www.springermedizin.de/resource/supplementary/12958_2010_686_MOESM4_ESM.pdf/9568584)

KGN

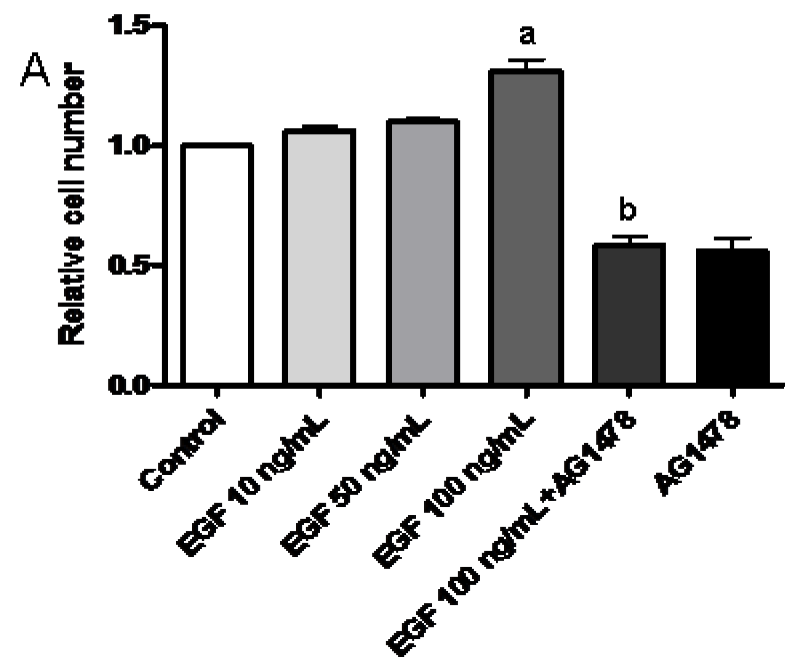

SVOG

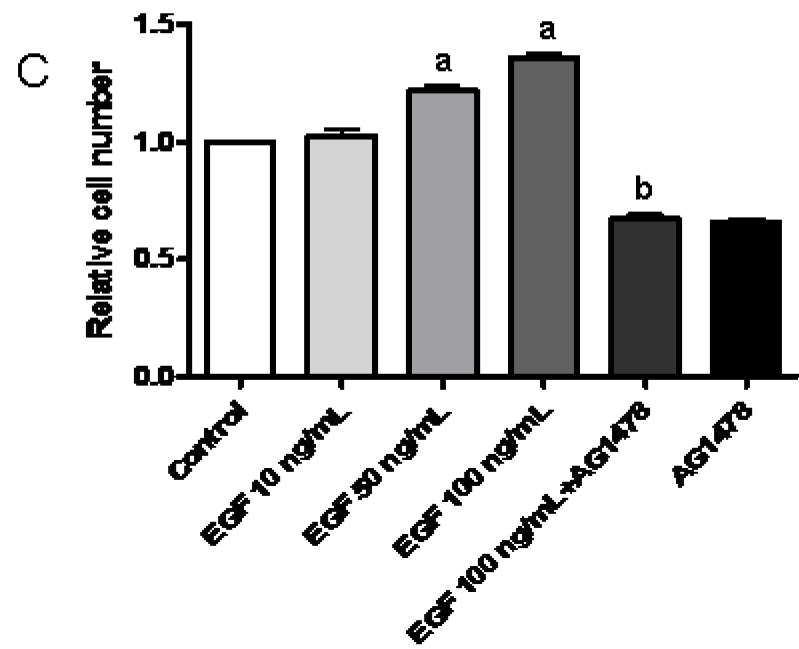**B**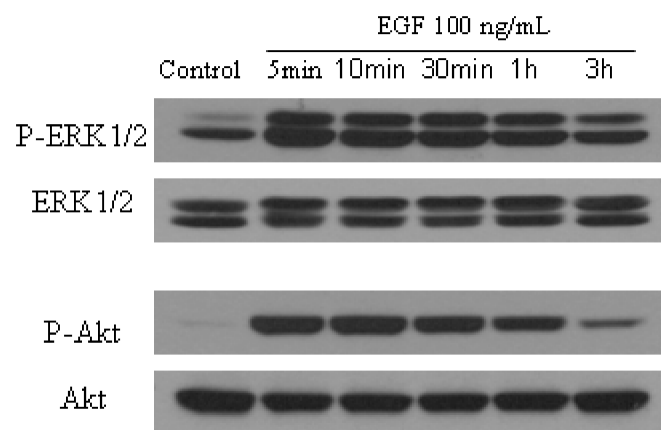**D**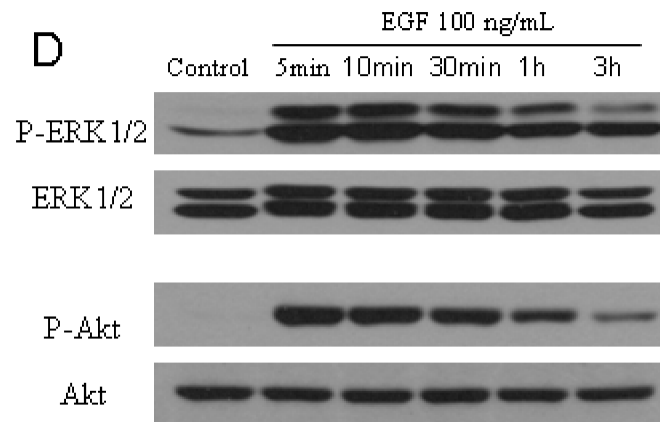

Supplement: MOESM4 [file 9568584]
